# Supplementary material for: Identification and characterization of conserved lncRNAs in human and rat brain
Source: PubMed Central journal article supplement (PMC5751786; doi:10.1186/s12859-017-1890-7), 2017-12-28

### Expression of Conserved Human lncRNAs

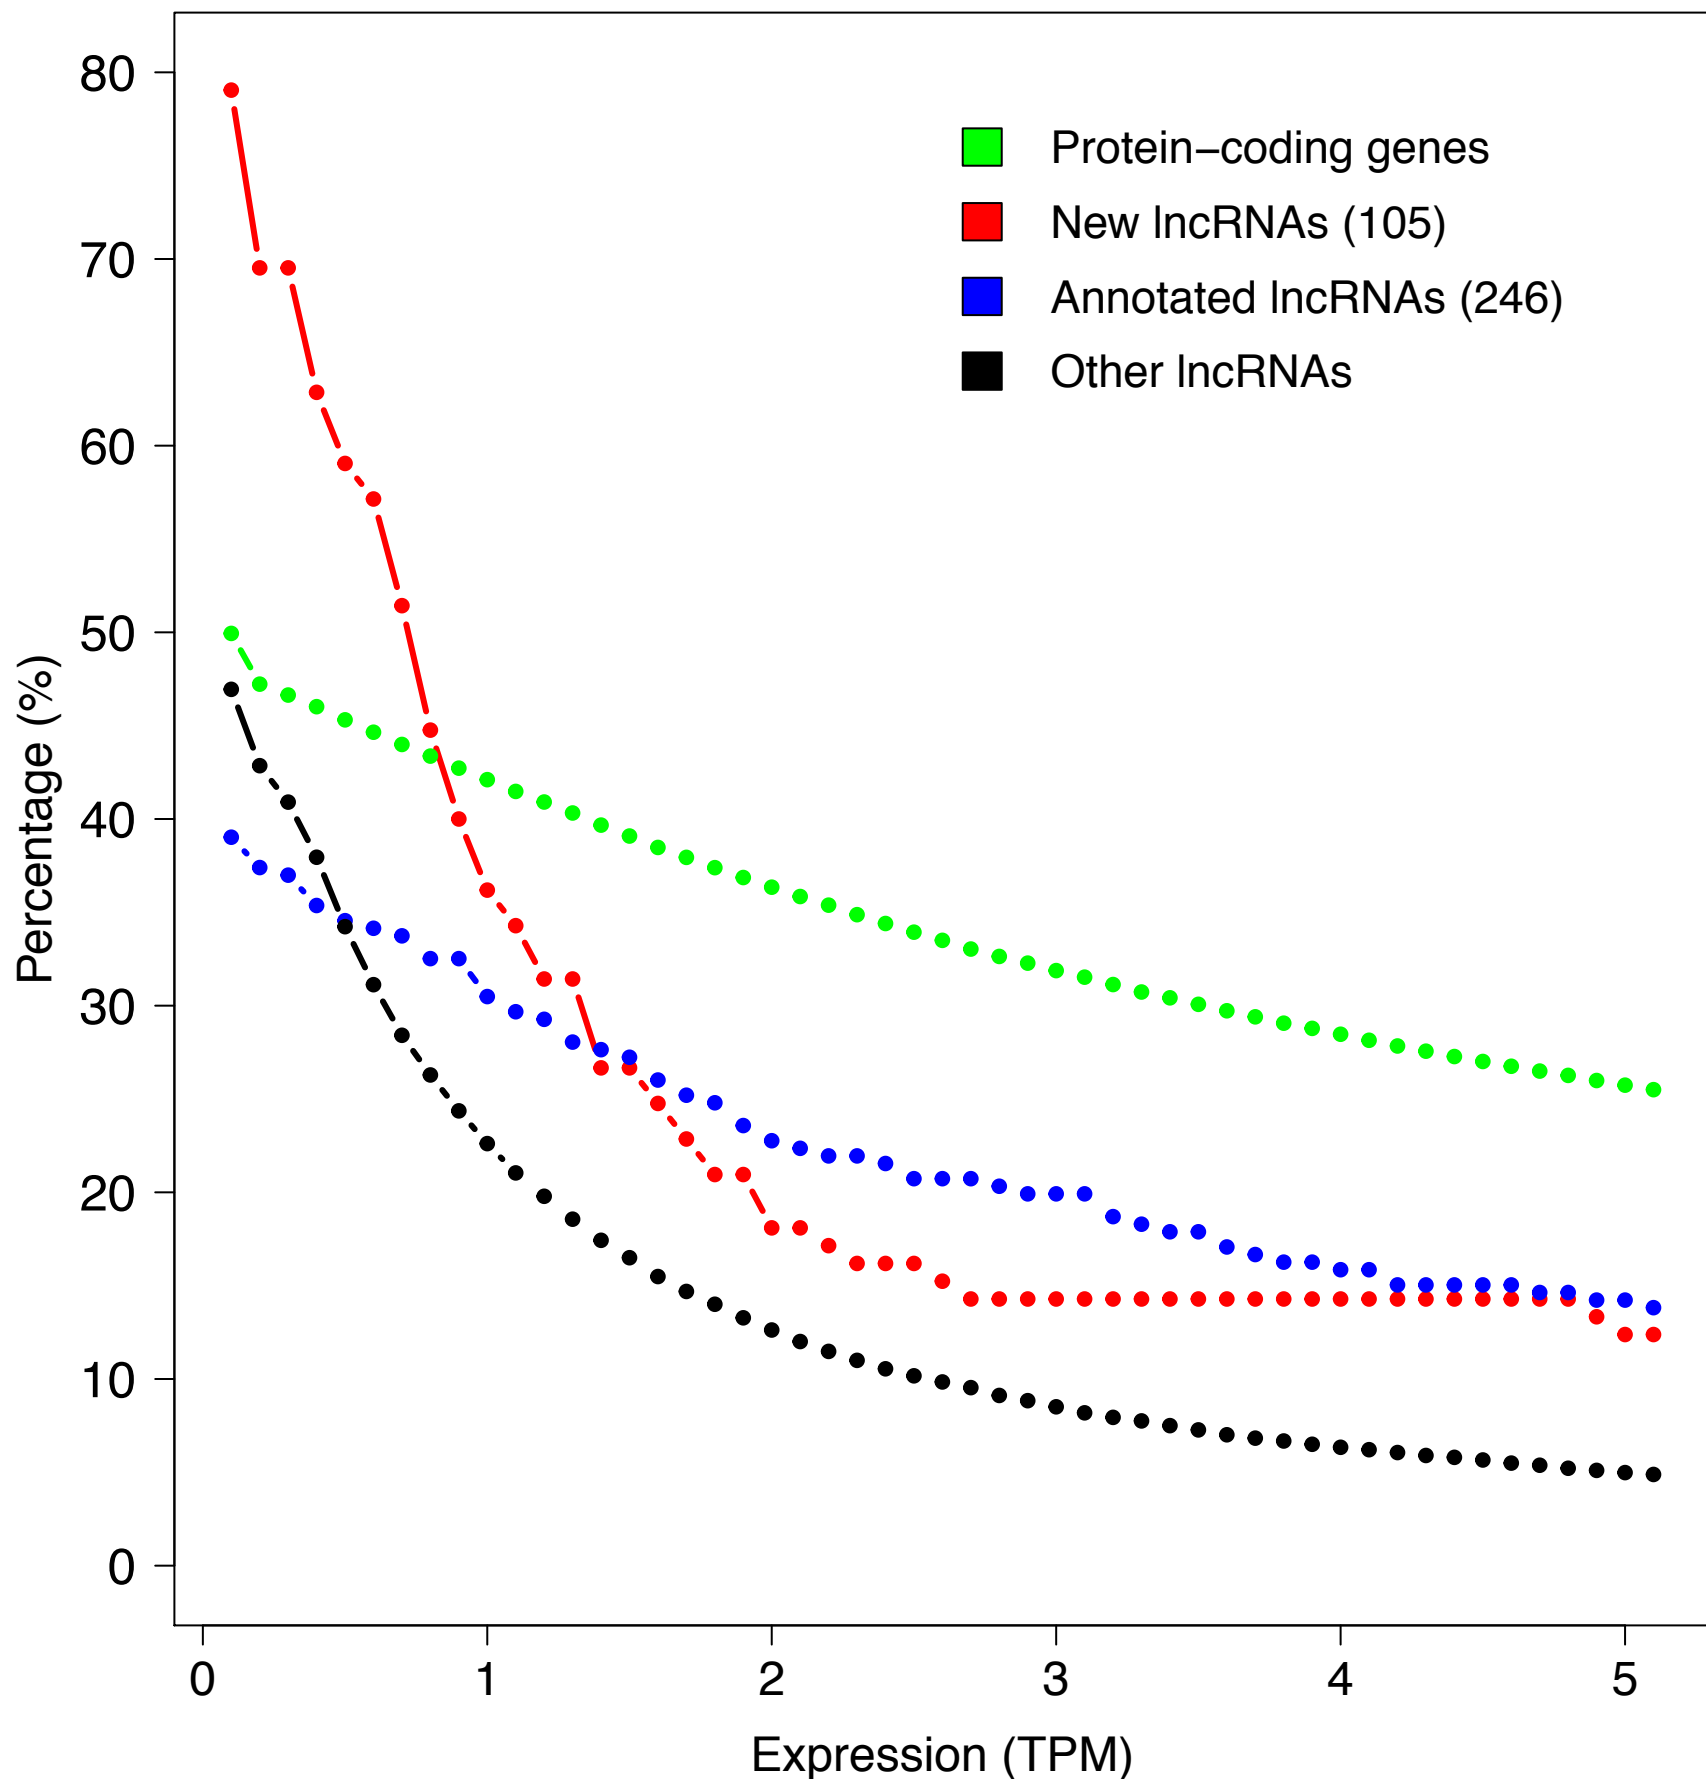

Supplement: 12859_2017_1890_MOESM2_ESM.pdf [file 12859_2017_1890_MOESM2_ESM.pdf]
