# Supplementary material for: Identification and characterization of conserved lncRNAs in human and rat brain
Source: PubMed Central journal article supplement (PMC5751786; doi:10.1186/s12859-017-1890-7), 2017-12-28

# UCSC Genome Browser on Rat Jul. 2014 (RGSC 6.0/rn6) Assembly

move <<< << < > >> >>> zoom in 1.5x 3x 10x base zoom out 1.5x 3x 10x 100x

chr3:83,049,274-83,165,171 115,898 bp.

chr3 (q31) p13p12 11 11 3q12 3q21 23 3q24 3q31 33 34 3q35 3q36 3q41 3q42 q43

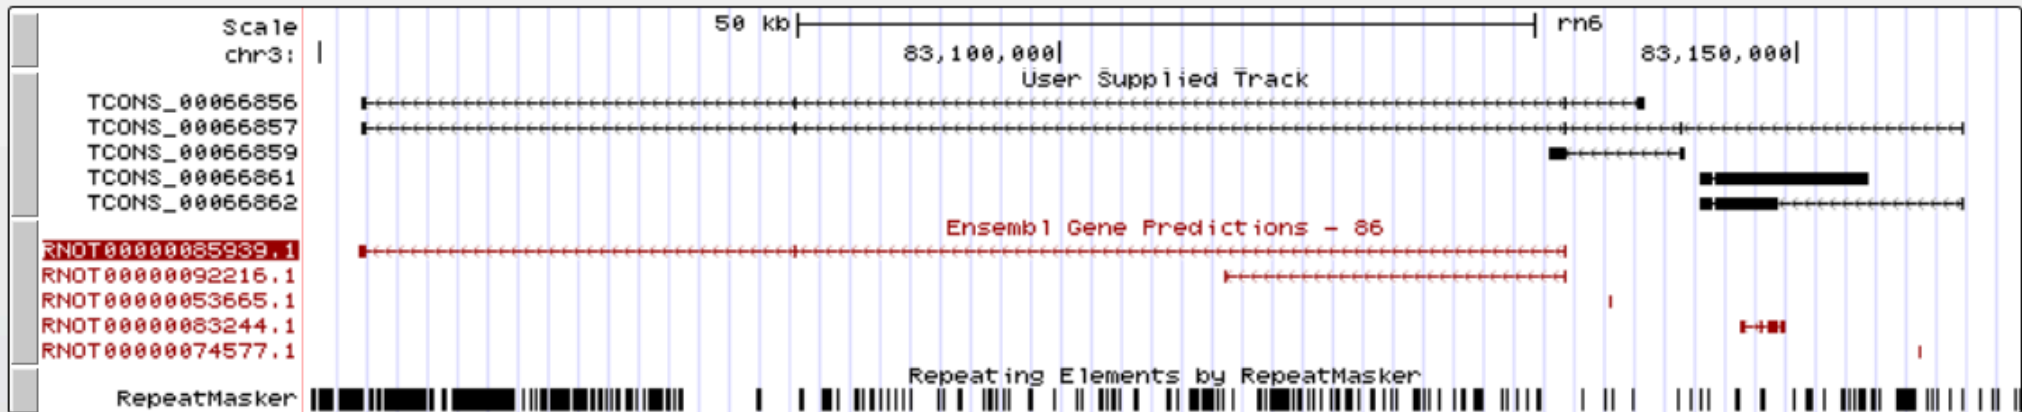

Supplement: 12859_2017_1890_MOESM3_ESM.pdf [file 12859_2017_1890_MOESM3_ESM.pdf]
